# Supplementary material for: Multifunctional imaging probe based on gadofulleride nanoplatform
Source: Royal Society of Chemistry journal article supplement (doi:10.1039/c2nr30836c), 2012-01-01
Supplement: c2nr30836c.pdf [file c2nr30836c.pdf]

## Supplementary Information

### Multifunctional imaging probe based on gadofulleride nanoplatfom

Jun-peng Zheng,<sup>a,b</sup> Qiao-ling Liu,<sup>b</sup> Ming-ming Zhen,<sup>a,b</sup> Feng Jiang,<sup>a,b</sup> Chun-ying Shu,<sup>\*a</sup> Chan Jin,<sup>c</sup> Yongji Yang,<sup>c</sup> Hisham A. Alhadlaq<sup>d</sup> and Chun-ru Wang<sup>\*a</sup>

<sup>a</sup>Beijing National Laboratory for Molecular Sciences, Key Laboratory of Molecular Nanostructures and Nanotechnology, Institute of Chemistry, Chinese Academy of Sciences, Beijing 100190, P. R. China;

<sup>b</sup>Graduate school of CAS, Beijing 100049, P. R. China;

<sup>c</sup>Institute of Biophysics, Second military medical university, Shanghai, 200433, China

<sup>d</sup>Dept. of Physics and Astronomy, King Saud University, Po Box 25, Riyadh 11451, Saudi Arabia

### Content List

1. Materials, methods and instruments.
2. Synthesis details.

**Fig. S1** Curve fitting of C1s binding energy in f-Gd@C<sub>82</sub>.

**Table S1.** Fitting of C1s binding energy

**Fig. S2** Fluorescent image of EMF-FA-FITC (a) and control (b) under excitation of 488 nm.

**Fig. S3** Relative UV absorbance of 5-FITC (a) and FA (b), the concentration of 5-FITC, FA and EMF-FA-FITC were 0.0088mM, 0.022mM and 0.003 mM, respectively, for estimation of conjugated FA and FITC ratio on f-Gd@C<sub>82</sub>.

**Fig. S4** Zeta potential of f-G@C<sub>82</sub> (green) and EMF-FA-FITC (red)

## 1. Materials, instruments and methods.

**Materials and instruments:** Endohedral metallofullerene Gd@C<sub>82</sub> was synthesized and purified as reported,<sup>1</sup> other reagents and organic solvents were all commercially available and used as received. Water was purified with Millipore Milli-Q Synthesis purifier (18.0 MΩ cm, Barnstead). Dynamic Light Scattering (DLS) was carried out on a Malvern Instruments Zetasizer Nano ZSI at a 173° scattering angle. X-ray photoelectron spectroscopy analysis was performed on ESCALab220i-XL (VG Instruments). The relaxation times were measured at 0.5 T with NMI20 Analyst (Shanghai Niumag Corporation, Shanghai, China).

### Methods:

**XPS characterization:** The chemical structure of f-Gd@C<sub>82</sub> was characterized using X-ray photoelectron spectroscopy (XPS). As shown in Fig. S1, the main line of the XPS spectrum exhibits a broad and asymmetric line-shape. Through the curve fitting, C1s peaks centered at binding energy of 284.8, 286.2 and 288.3 eV appear and should assign for C-C, C-O and C=O bonds, respectively, suggesting the existence of carboxyl groups and hydroxyl groups on the carbon cage. The intensities of these C1s components in f-Gd@C<sub>82</sub> were estimated from area integrals under each line to be 68.8%, 16.4%, and 14.8%, respectively. Thus, f-Gd@C<sub>82</sub> can be designated as Gd@C<sub>82</sub>(OH)<sub>~24</sub>(CH<sub>2</sub>CH<sub>2</sub>COOH)<sub>~22</sub>.

**Longitudinal relaxivity measurement and MR imaging:** The longitudinal relaxation times were measured in distilled water at 0.5 T (Niumag NMI20-Analyst) at 37 °C, using an inversion recovery (IR) sequence. Solutions in different Gd concentrations were prepared by diluting the stock solution with deionized water. The concentrations of Gd were determined by ICP-AES. The measurement parameters at IR sequence were shown as follows: T<sub>R</sub> = 3000 ms, D<sub>1</sub> = 1 ms, Add D<sub>1</sub> = 100 ms, N<sub>IR</sub> = 40 per acquisition, the number of acquisition = 4.

MR Images were performed on a Niumag NMI20-Analyst (22 MHz, 0.5 T, 37 °C). The magnet was equipped with the standard gradient set and 15 mm internal diameter volume coil. Aqueous solution of EMF-FA-FITC in 0.1 mM was prepared. Meanwhile, a sample of distilled water and an aqueous solution of commercial Gd-DTPA in 0.5 mM were used as control. The measurement conditions were as follows: T<sub>1</sub>-weighted sequence: Spin echo, T<sub>R</sub> = 1500 ms, T<sub>E</sub> = 17 ms, D<sub>0</sub> = 400 ms.

**Fluorescent image of EMF-FA-FITC:** The purified EMF-FA-FITC shows distinct fluorescent signals in view field under excitation wavelength at 488 nm, whereas the control sample that collected after dialyzing free 5-FITC under the same condition shows no fluorescent signal because 5-FITC in the low molecular weight can be completely removed during dialysis process.

**Cell culture:** The Hela cells were cultured with Dulbecco's modified Eagle's medium (DMEM) (Invitrogen, USA) supplemented with 10 % fetal bovine serum (Hyclone Company, South Logan, UT), penicillin (100 µg/mL), and streptomycin (100 µg/mL) (Gibco, Grand Island, N. Y. USA) in 5% CO<sub>2</sub> at 37 °C in a humidified incubator.

**TEM characterization:** Cells with incubation of EMF-FA-FITC and EMF-FITC for 3 h, respectively, were washed by Hank's balanced salt solution (HBSS) to remove all noninternalized particles and fixed overnight in 4 % glutaraldehyde and then in 4 % paraformaldehyde at 4 °C. After that, cells were centrifugated under 1000 rpm for 5 minutes, and washed with 0.1 M phosphate-buffered saline (PBS) three times. All the cells were fixed in 3 % glutaraldehyde containing blood plasma in small amount overnight at 4 °C for coagulating. Afterwards the cells were post-fixed with 1 % osmium tetroxide for 2 h at room temperature in 1 mm<sup>3</sup> masses. The cells were then dehydrated in a graded series of ethanol and acetone and embedded in Epon812. Ultra-thin section were cut by ultramicrotome (UC6, Leica Ltd. Co, Germany), and transferred onto 200-mesh copper grids, strained with uranyl acetate and lead nitrate and observed with a H-7650 TEM (Hitachi Ltd. Co, Japan).

## 2. Synthesis details.

**Synthesis of f-Gd@C<sub>82</sub>:** In a typical synthesis procedure, functionalized Gd@C<sub>82</sub> was synthesized and purified similar to literature reported.<sup>2</sup> In brief, Gd@C<sub>82</sub> (ca. 3 mg) in 5 mL of *o*-dichlorobenzene was added succinic acid peroxide (3.2 mg, 5 equiv.). The resultant solution was deaerated with flowing argon and heated at 84°C overnight. Then, 15 mL of 0.2 M NaOH aqueous solution was added to extract the water-soluble product. Two layers were obtained; the top layer was deep brown and the bottom layer was colorless. The top layer was concentrated, and the residue was purified via a Sephadex G-25 (Pharmacia) size-exclusion gel column with pure water as eluent to obtain a narrow brown band with pH = 6-7.

**Synthesis of FA-ED (ethylenediamine modified folic acid):** 88.4 mg of folic acid (0.2 mM) was dissolved in 5 mL of DMSO in a round-bottomed flask under stirring at 40 °C. A combination of 2.0 molar equivalent of DCC and NHS were then added to the solution, which was stirred for 12 h. The resulting solution was centrifuged at 10,000 for 1 min and the supernatant was filtered using a syringe filter with pore size of 0.22 μm. Then 5 molar equivalent of ethylenediamine was added to the filtrate and stirred for 3 h. The solution was precipitated using 50 mL of acetone/ether mixture (V/V = 3:7). The precipitation was collected through Buchner funnel and washed with ether.

**Synthesis of EMF-FA:** For further conjugation, f-Gd@C<sub>82</sub> (ca. 4 mg, 0.002 mM) was dissolved in 10 mL of PBS buffer (pH = 7.4) under stirring. Then 19.1 mg of EDC and 11.5 mg of NHS were added to the solution to activate the carboxyl groups of gadofulleride. After 10 min, FA-ED in 500 μL of DMSO solution was added to the solution while stirring. After 4 h, the resulting solution was dialyzed with NaOH solution (pH = 9) and distilled water, respectively, yielding the pure EMF-FA.

**Synthesis of EMF-FA-FITC:** The as-prepared EMF-FA solution was evaporated and then dissolved in 10 mL of MES buffer (pH = 6.5). 19.1 mg of EDC and 11.5 mg of NHS were added to the solution while stirring. After 10 min, 5-FITC (5 mg/mL) in 7 μL of DMF solution was added to the stirring solution and the resulting solution was striring in the dark for 3h, and dialyzed with distilled water subsequently, yielding the pure EMF-FA-FITC.

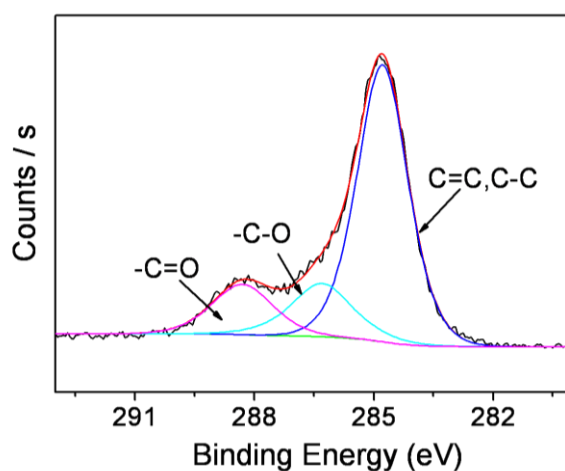

**Fig. S1** Curve fitting of C1s binding energy in f-Gd@C<sub>82</sub>.

**Table S1.** Fitting of C1s binding energy

| Bond (C1s) | Binding Energy (eV) | Area   | FWHM (eV) | %GL (%) |
|------------|---------------------|--------|-----------|---------|
| C-C,C=C    | 284.8               | 9886.5 | 1.6       | 80      |
| C-O        | 286.4               | 2356.4 | 1.8       | 80      |
| C=O        | 288.2               | 2134.2 | 1.8       | 80      |

Combined with the area integral of C<sub>1s</sub> binding energy under different chemical environment, the average molecular formula can be designed as Gd@C<sub>82</sub>(OH)<sub>24</sub>(CH<sub>2</sub>CH<sub>2</sub>COOH)<sub>22</sub>.

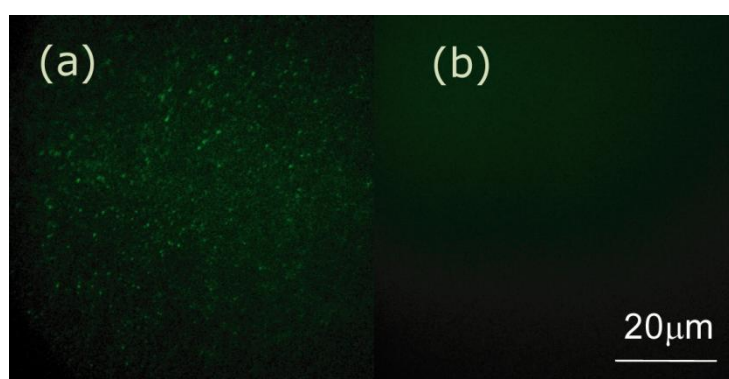

**Fig. S2** Fluorescent image of EMF-FA-FITC (a) and control (b) under excitation of 488 nm.

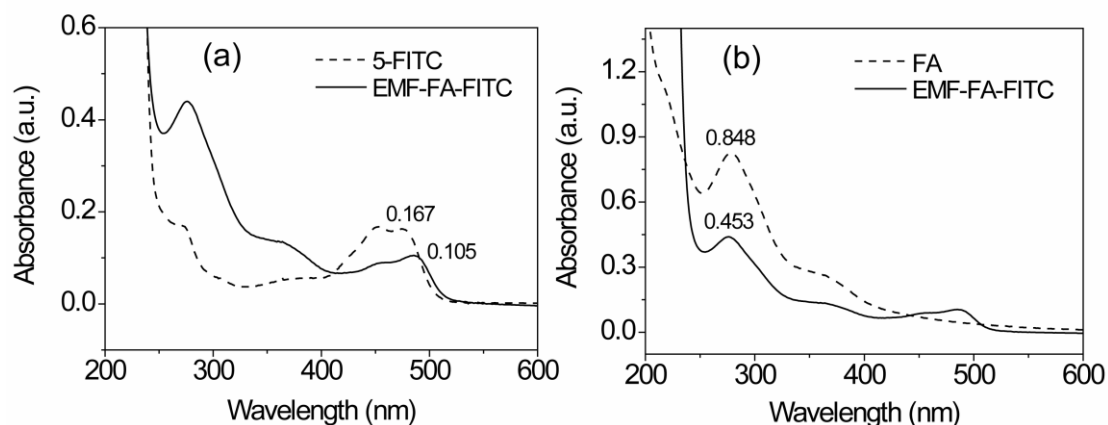

**Fig. S3** Relative UV absorbance of 5-FITC (a) and FA (b), the concentration of 5-FITC, FA and EMF-FA-FITC were 0.0088mM, 0.022mM and 0.003 mM, respectively, for the estimation of conjugated FA and FITC ratio on f-G@C<sub>82</sub>.

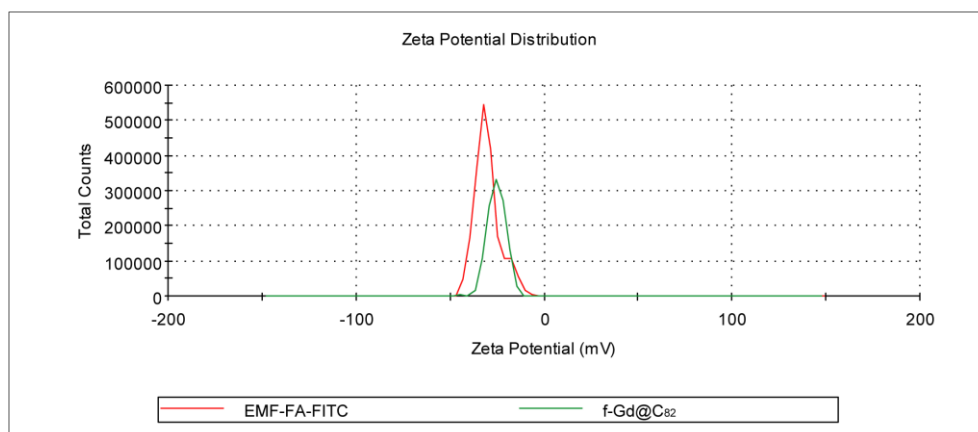

**Fig. S4** Zeta potential of f-G@C<sub>82</sub> (green) and EMF-FA-FITC (red)

## References:

- 1 D. W. Cagle, S. J. Kennel, S. Mirzadeh, J. M. Alford and L. J. Wilson, *Proc. Natl. Acad. Sci. USA*, 1999, **96**, 5182.
- 2 C. Y. Shu, F. D. Corwin, J. F. Zhang, Z. J. Chen, J. E. Reid, M. H. Sun, W. Xu, J. H. Sim, C. R. Wang, P. P. Fatouros, A. R. Esker, H. W. Gibson and H. C. Dorn, *Bioconjugate Chem.*, 2009, **20**, 1186.
